# Supplementary material for: Electrostriction and counter ion effects in an outer-sphere electron transfer reaction. Kinetics of the reduction of hexachloroiridate(IV) by iodide ion†
Source: Royal Society of Chemistry journal article supplement (doi:10.1039/b009363g), 2001-01-01
Supplement: b009363g.doc [file b009363g.doc]

**Supplementary Table S1. Observed Rate Constants (kobs s-1) for Reaction between IrCl62- and I- at Different Temperaturesa**

| Medium |  |  | kobs, s-1 | at °C |  |  |  |
| --- | --- | --- | --- | --- | --- | --- | --- |
| Acid | Salt | 20.0 | 25.0 | 30.0 | 35.0 | 40.0 | 45.0 |
| 0.50M H2SO4b | - | - | 1.43 | 1.64 | 1.95 | 2.33 | 2.64 |
| 0.50M H2SO4 | - | - | 2.81 | 3.36 | 3.98 | 4.44 | - |
| 0.050M H2SO4 | - | 0.823 | 1.01 | 1.22 | 1.42 | 1.66 | - |
| 0.050M H2SO4 | 0.45M H2SO4 | 2.90 | 3.58 | 5.03 | 6.18 | 7.33 | - |
| 1.0M HClO4c | - | 23.3 | 28.6 | 34.8 | 39.7 | 48.8 | - |
| 1.0M HClO4 | - | - | 4.45 | 5.57 | 6.68 | 8.22 | - |
| 1.0M HClO4 | - | 5.20d | 5.50e | 6.26f | 6.68g | 7.32h | 8.10i |
| 0.10M HClO4 | - | 1.01 | 1.20d | 1.47j | 1.74k | 2.03 | - |
| 0.10M HClO4 | 0.90M LiClO4 | 2.94 | 3.63 | - | 6.12 | 7.58 | 8.97 |
| 1.0M HNO3 | - | 3.97 | 4.78 | 5.71 | 6.97 | - | - |
| 0.10M HNO3 | - | 0.989 | 1.18 | 1.45 | 1.72 | 2.02 | - |
| 0.10M HNO3 | 0.90M NaNO3 | 3.77 | 4.52 | 6.59 | 7.86 | 9.52 | - |
| 0.10M HNO3 | 0.90M NaNO3 | 3.92 | 5.04 | 6.85 | 8.17 | 9.60 | - |
| 1.0M HCl | - | - | 6.52 | 8.06 | 9.53 | 12.1 | - |
| 1.0M HCl | - | 5.47 | 6.97 | 8.44 | 10.8 | - | - |
| 1.0M HCl | - | 5.32 | 6.91 | 9.59 | 9.98 | 11.4 | - |
| 0.50M HCl | - | - | 3.30 | 3.64 | 4.28 | 4.80 | - |
| 0.10M HCl | - | - | 1.29 | 1.49 | 1.73 | 1.94 | - |
| 0.10M HCl | 0.90M NaCl | 7.04 | 8.87 | 10.2 | 13.1 | 15.3 | - |
| 0.10M HNO3 | 0.90M NaClO4 | 4.55 | 6.30 | 7.45 | 9.07 | 11.4 | - |

a [I-] = 2.0 x 10-3 M; [IrCl62-] = 6.3 x 10-5 M, unless specified otherwise.; b [I-] = 1.0 x 10-3 M.; c [I-] = 1.0 x 10-2 M.; d T = 27.5 oC.; e T = 30.0 oC.; f T = 32.5 oC.; g T = 35.0 oC.; h T = 37.5 oC.; i T = 40.0 oC.; j T = 25.1 oC.; k T = 30.1 oC.

**Supplementary Table S2. Pressure Dependence of Observed Rate Constants, (kobs (s-1)), for the Reaction of IrCl62- with I-**

The data (runs 1 - 24) are presented as averagea kobs in s-1, with the relevant pressure in MPa in brackets, following each value (the medium and temperature are given initially). The concentrations of reactants are given in footnote b.

1. 0.50 M H2SO4, T = 25.0 oC: 7.22 (5), 9.99 (25), 12.8 (50), 16.9 (75).

2. 0.50 M H2SO4, T = 25.0 oC; 11.8 (5), 15.2 (25), 19.4 (50).

3. 0.50 M H2SO4, T = 25.0 oC; 2.94 (5), 3.71 (20), 4.55 (40), 5.36 (60), 6.98 (80).

4. 0.050 M H2SO4, T = 25.0 oC; 1.03 (10), 1.23 (25), 1.64 (50), 2.19 (75), 2.80 (100), 3.40 (125).

5. 0.050 M H2SO4/0.45 M H2SO4, T = 25.0 oC; 3.66 (10), 4.64 (25), 5.78 (50), 7.25 (75), 8.81 (100), 10.6 (125).

6. 1.0 M HClO4, T = 25.0 oC; 5.09 (5), 6.40 (25), 7.25 (40), 8.59 (60), 10.4 (80), 12.1 (100).

7. 1.0 M HClO4, T = 25.0 oC; 2.26 (11), 2.69 (25), 3.33 (50), 4.09 (75), 5.24 (100), 6.19 (119).

8. 0.10 M HClO4, T = 25.0 oC; 1.17 (20), 1.48 (40), 1.83 (60), 2.34 (100). 2.60 (125).

9. 0.10 M HClO4/0.90 M NaClO4, T = 25.0 oC; 5.58 (10), 7.64 (40), 9.39 (60), 11.5 (100).

10. 1.0 M HNO3, T = 25.0 oC; 4.57 (10). 5.26 (25), 6.53 (50), 8.50 (75), 11.6 (100), 13.3 (125), 14.1 (130).

11. 0.10 M HNO3, T = 25.0 oC; 1.29 (10), 1.53 (25), 2.46 (75), 3.91 (125).

12. 1.0 M HCl. T = 25.0 oC; 5.64 (10), 7.00 (25), 8.93 (50), 12.7 (75), 16.2 (100).

13. 0.10 M HCl/0.90 M NaCl, T = 25.0 oC; 7.56 (10), 8.46 (25), 10.9 (50), 14.7 (75), 17.7 (100).

14. 0.10 M HCl/0.90 M NaCl, T = 10.0 oC; 4.41 (10), 4.95 (25), 6.16 (50), 7.59 (75).

15. 0.10 M HCl/0.90 M NaCl, T = 10.0 oC; 4.14 (10), 5.89 (50), 9.00 (100), 11.1 (125).

16. 0.10 M HCl/0.90 M KCl, T = 10.0 oC; 14.4 (10), 16.7 (25), 18.5 (50), 23.5 (75), 28.1 (100).

17. 0.10 M HCl/0.90 M KCl, T = 10.0 oC; 9.73 (10), 12.0 (40), 15.0 (60), 18.1 (110).

18. 0.10 M HCl/0.90 M KCl, T = 10.0 oC; 9.96 (10), 13.7 (50), 17.7 (100).

19. 0.10 M HCl/0.90 M NaCl, T = 10.0 oC; 2.45 (10), 2.84 (25), 3.60 (50), 4.30 (75), 4.86 (100).

20. 0.10 M HClO4/0.90 M NaClO4, T = 10.0 oC; 1.46 (10), 1.73 (25), 2.12 (50), 2.64 (75), 3.04 (100).

21. 0.10 M HClO4/0.90 M NaClO4, T = 25.0 oC; 3.78 (10), 4.48 (25), 5.61 (50), 7.02 (75), 8.43 (100), 10.3 (125).

22. 1.0 M HCl, T = 25.0 oC; 7.28 (10), 9.36 (25), 13.3 (50), 16.2 (75), 20.3 (130).

23. 0.50 M HNO3/0.50 M KNO3; T = 25.0 oC; 9.42 (20), 10.6 (4)), 12.2 (60), 14.3 (80).

24. 0.10 M HCl/0.90 M KCl; T = 5.4 oC; 13.6c (20), 15.7 (40), 17.9c (60), 20.9 (100)

a Four or five replicates to yield average kobs values, except as noted in footnote c

b Runs 4 - 6, 8 - 16 and 21 - 24. [I-] = 2.0 x 10-3 M; [IrCl62-] = 1.25 x 10-4 M; Run 7 [I-] = 1.0 x 10-3 M; [IrCl62-] = 1.25 x 10-4M

Runs 17 - 20. [I-] = 1.25 x 10-3 M; [IrCl62-] = 1.25 x 10-4 M

Run 1. [I-] = 5.0 x 10-3 M; [IrCl62-] = 1.5 x 10-4 M

Run 2. [I-] = 7.5 x 10-3 M; [IrCl62-] = 1.5 x 10-4 M

Run 3. [I-] = 2.0 x 10-3 M; [IrCl62-] = 0.63 x 10-4 M

c Average of two values only
